# Supplementary material for: Guanine binding to gold nanoparticles through nonbonding interactions
Source: Royal Society of Chemistry journal article supplement (doi:10.1039/c3cp52149d), 2013-10-11
Supplement: c3cp52149d.pdf [file c3cp52149d.pdf]

## Electronic Supplementary Information

### Guanine Binding to Gold Nanoparticles through Nonbonding Interactions

Xi Zhang<sup>1</sup>, Chang Q. Sun<sup>2</sup> and Hajime Hirao<sup>1\*</sup>

<sup>1</sup> *Division of Chemistry and Biological Chemistry, School of Physical and Mathematical Sciences,*

*Nanyang Technological University, 21 Nanyang Link, Singapore, 637371*

<sup>2</sup> *School of Electric and Electronic Engineering, Nanyang Technological University, 50 Nanyang*

*Avenue, Singapore, 639794*

\*E-mail: [hirao@ntu.edu.sg](mailto:hirao@ntu.edu.sg)

Supporting information includes the following parts:

#### 1. Mulliken Charges

**Figure S1.** Mulliken charges of Au<sub>13</sub>, Au<sub>13</sub>-G1 and Au<sub>13</sub>-G2. Negative values mean electron gain and are observed at the surface shell of NPs.

#### 2. LDOS of Au<sub>13</sub> and Au<sub>147</sub>

**Figure S2.** Comparison of LDOS of Au<sub>13</sub> and Au<sub>13</sub>-G (complex) at the bonding gold atom (Au(B)) and corner atoms in layers with label 1 referring to the surface.

**Figure S3.** Comparison of LDOS of Au<sub>147</sub> and Au<sub>147</sub>-G (complex) at bonding gold atom (Au(B)) and corner atoms in layers with label 1 referring to the surface.

#### 3. FO Analysis of Au<sub>13</sub>-G1 (N(5)-Au; O-Au)

**Table S1.** Gross charges in FO of Au<sub>13</sub>-G1 (N5): spin up.

**Table S2.** Gross charges in FO of Au<sub>13</sub>-G1 (N5): spin down.

**Table S3.** Shape of FO Basis: spin up

**Table S4.** Shape of FO Basis: spin down

**Table S5.** Shape and Coefficients of key MO in Au<sub>13</sub>-G1 Complex

#### 4. FO Analysis of Au<sub>13</sub>-G2 (N(2)-Au; H...Au)

**Table S6.** Gross charges in FO of Au<sub>13</sub>-G2 (N2): spin up.

**Table S7.** Gross charges in FO of Au<sub>13</sub>-G2 (N2): spin down.

**Table S8.** Shape of FO basis (spin up and spin down has slight difference)

**Table S9.** Shape and coefficients of key MO in Au<sub>13</sub>-G2 Complex

#### 5. XYZ coordinates of optimized geometries

## 1. Mulliken Charges

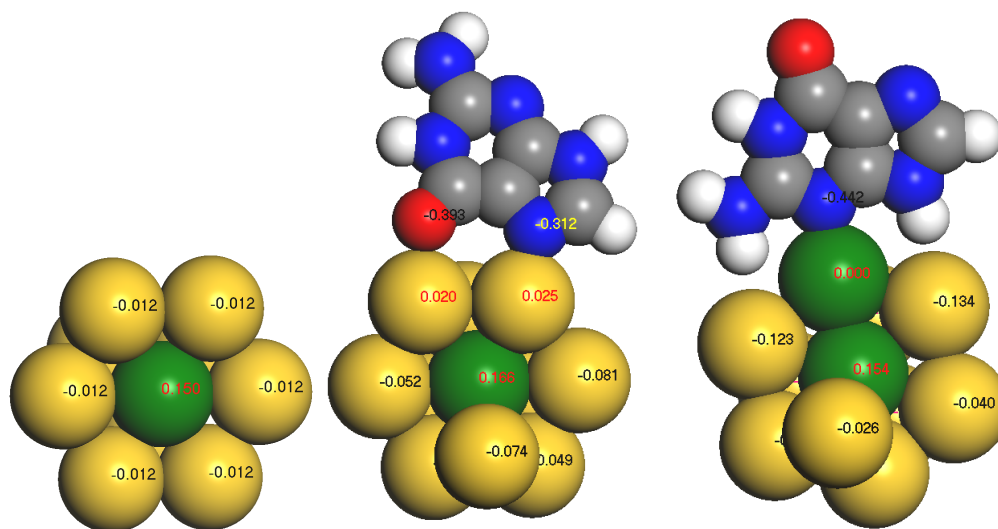

**Figure S1.** Mulliken charges of Au<sub>13</sub>, Au<sub>13</sub>-G1 and Au<sub>13</sub>-G2. Negative values mean electron gain and are observed at the surface shell of NPs. Positive values mean electron loss and are observed in core shells, indicating charge transfer from center to the surface.

## 2. LDOS of Au<sub>13</sub> and Au<sub>147</sub>

As shown in Figures S2 and S3, valence charges at 1<sup>st</sup> atomic shell are polarized upward to  $E_F$ . Au<sub>N</sub> atomic site changes its valence electrons while others remain more or less the same. The results indicate that the polarization occurs mostly at the surface layer of the cluster, and enhances the Au–N bond formation.

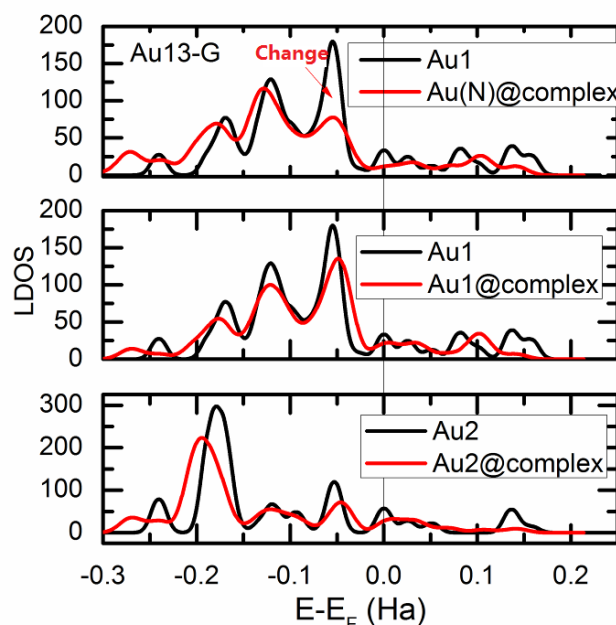

**Figure S2** Comparison of LDOS of Au<sub>13</sub> and Au<sub>13</sub>-G1 (complex) at the bonding gold atom (Au(N)) and corner atoms in layers with label 1 referring to the surface.

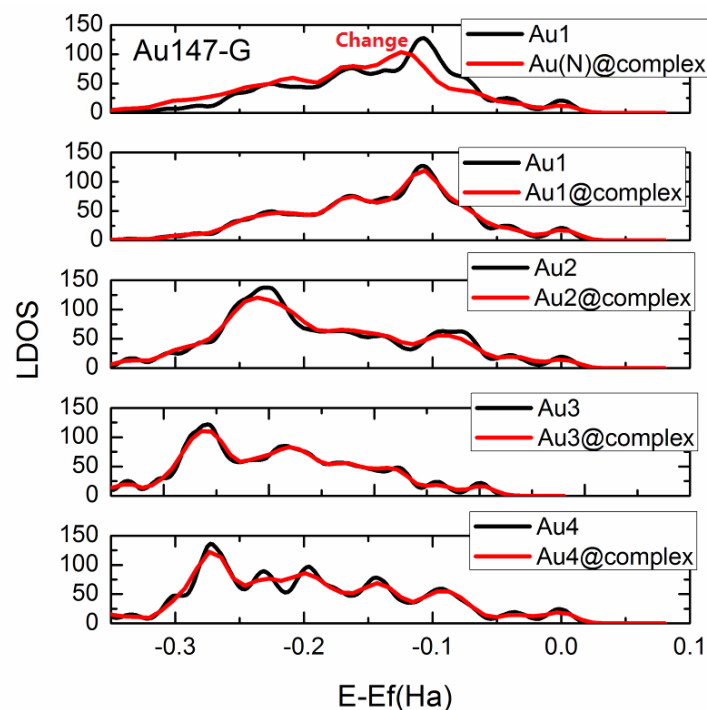

**Figure S3** Comparison of LDOS of Au<sub>147</sub> and Au<sub>147</sub>-G1 (complex) at the bonding gold atom (Au(N)) and corner atoms in layers with label 1 referring to the surface.

### 3. FO analysis of Au<sub>13</sub>-G1 (N(5)-Au; O-Au)

Au<sub>13</sub> in the doublet spin state has 247 FOs for each spin. 124 FOs are occupied for spin-up while 123 MOs occupied for spin-down. Guanine in the singlet state has 179 FOs with 39 orbitals occupied for each spin. The Au<sub>13</sub>-G complexes in the doublet state have 426 MOs for each spin. 163 MOs are occupied for spin up while 162 MOs occupied for spin down.

Despite the different adsorption sites in Au<sub>13</sub>-G1 and Au<sub>13</sub>-G2, electron donation from the *p<sub>z</sub>* lone pair of N to the Au unoccupied orbital always occurs because of the high electron-donation ability of the N lone pair. In Au<sub>13</sub>-G1, oxygen also donates *p<sub>z</sub>* electrons and forms a Au-O bond with a bond order of 0.247.

Besides the donation from guanine to Au, because of the filled *d* shells of Au, the back-donation from Au to guanine is also considerable. In Au<sub>13</sub>-G1, the back-donation occurs through the  $\pi$  bond between Au *d<sub>yz</sub>* orbital and N, O *p<sub>y</sub>* orbitals, while in Au<sub>13</sub>-G2, back donation is through the Au... H-N hydrogen bond. The results of gross FO population analysis in Tables S6 and S7 show that charge gain of unoccupied FO of guanine occurs mainly in orbitals *g<sub>42</sub>*, *g<sub>44</sub>* and *g<sub>45</sub>*, which are all dominated by the H unoccupied orbital as shown in Table S8. The coefficients of MOs 161 and 162 in Au<sub>13</sub>-G2 in Table S9 also indicate the formation of a bond between the occupied Au 6*s* orbital in FO *a<sub>122</sub>* and *a<sub>123</sub>* with the H unoccupied orbital in *g<sub>42</sub>*, *g<sub>44</sub>* and *g<sub>45</sub>*.

**Table S1.** Gross populations in FO of Au<sub>13</sub>-G1 (N5) for the spin-up electrons. HOMO is 124 for Au<sub>13</sub> and is 39 for guanine.

| <b>Au13</b> |       |    |       | <b>Guanine</b> |              |            |              |           |              |           |              |
|-------------|-------|----|-------|----------------|--------------|------------|--------------|-----------|--------------|-----------|--------------|
| 1           | 1.000 | 41 | 1.000 | 81             | 0.999        | 121        | 0.999        | 1         | 1.000        | <b>41</b> | <b>0.018</b> |
| 2           | 1.000 | 42 | 1.000 | 82             | 0.999        | <b>122</b> | <b>0.979</b> | 2         | 1.000        | 42        | 0.002        |
| 3           | 1.000 | 43 | 1.000 | 83             | 0.999        | <b>123</b> | <b>0.820</b> | 3         | 1.000        | <b>43</b> | <b>0.012</b> |
| 4           | 1.000 | 44 | 1.000 | 84             | 0.999        | <b>124</b> | <b>0.985</b> | 4         | 1.000        | 44        | 0.002        |
| 5           | 1.000 | 45 | 1.000 | 85             | 0.998        | <b>125</b> | <b>0.270</b> | 5         | 1.000        | 45        | 0.001        |
| 6           | 1.000 | 46 | 1.000 | 86             | 0.999        | <b>126</b> | <b>0.062</b> | 6         | 1.000        | 46        | 0.001        |
| 7           | 1.000 | 47 | 1.000 | 87             | 0.998        | <b>127</b> | <b>0.050</b> | 7         | 1.000        | 47        | 0.003        |
| 8           | 1.000 | 48 | 1.000 | 88             | 1.000        | 128        | 0.004        | 8         | 1.000        | 48        | 0.003        |
| 9           | 1.000 | 49 | 1.000 | 89             | 0.999        | 129        | 0.038        | 9         | 1.000        | 49        | 0.001        |
| 10          | 1.000 | 50 | 1.000 | 90             | 1.000        | 130        | 0.016        | 10        | 1.000        | 50        | 0.001        |
| 11          | 1.000 | 51 | 1.000 | 91             | 0.998        | 131        | 0.008        | 11        | 1.000        | 51        | 0.000        |
| 12          | 1.000 | 52 | 1.000 | 92             | 0.998        | 132        | 0.002        | 12        | 1.001        | 52        | 0.002        |
| 13          | 1.000 | 53 | 0.999 | 93             | 0.997        | 133        | 0.020        | 13        | 0.997        | 53        | 0.003        |
| 14          | 1.000 | 54 | 1.004 | 94             | 0.993        | 134        | 0.006        | 14        | 0.997        | 54        | 0.001        |
| 15          | 1.000 | 55 | 1.000 | 95             | 0.999        | 135        | 0.003        | 15        | 0.999        | 55        | 0.000        |
| 16          | 1.000 | 56 | 1.000 | 96             | 0.999        | 136        | 0.009        | 16        | 0.998        | 56        | 0.001        |
| 17          | 0.999 | 57 | 1.000 | 97             | 0.999        | 137        | 0.004        | 17        | 0.994        | 57        | 0.000        |
| 18          | 1.000 | 58 | 1.001 | 98             | 0.998        | 138        | 0.003        | 18        | 0.997        | 58        | 0.000        |
| 19          | 1.000 | 59 | 1.001 | 99             | 0.999        | 139        | 0.003        | 19        | 0.998        | 59        | 0.000        |
| 20          | 1.000 | 60 | 1.004 | 100            | 0.992        | 140        | 0.008        | 20        | 0.998        | 60        | 0.001        |
| 21          | 1.000 | 61 | 1.003 | 101            | 0.999        | 141        | 0.002        | 21        | 0.995        | 61        | 0.001        |
| 22          | 1.000 | 62 | 1.000 | 102            | 0.995        | 142        | 0.008        | 22        | 0.998        | 62        | 0.000        |
| 23          | 1.000 | 63 | 1.000 | 103            | 0.997        | 143        | 0.001        | 23        | 0.999        | 63        | 0.000        |
| 24          | 1.000 | 64 | 1.000 | 104            | 0.998        | 144        | 0.001        | 24        | 0.998        | 64        | 0.002        |
| 25          | 1.000 | 65 | 1.000 | 105            | 0.998        | 145        | 0.001        | 25        | 0.999        | 65        | 0.001        |
| 26          | 1.000 | 66 | 0.999 | 106            | 0.999        | 146        | 0.000        | 26        | 0.998        | 66        | 0.001        |
| 27          | 1.000 | 67 | 1.000 | 107            | 0.998        | 147        | 0.001        | 27        | 1.000        | 67        | 0.000        |
| 28          | 1.000 | 68 | 1.000 | 108            | 0.992        | 148        | 0.000        | 28        | 0.999        | 68        | 0.000        |
| 29          | 1.000 | 69 | 1.000 | 109            | 0.997        | 149        | 0.000        | 29        | 1.000        | 69        | -0.003       |
| 30          | 1.000 | 70 | 1.000 | 110            | 0.997        | 150        | 0.001        | 30        | 0.999        | 70        | -0.001       |
| 31          | 1.000 | 71 | 0.998 | 111            | 0.998        | 151        | 0.002        | 31        | 0.966        | 71        | -0.001       |
| 32          | 1.000 | 72 | 1.000 | 112            | 0.999        | 152        | 0.001        | 32        | 0.999        | 72        | -0.001       |
| 33          | 1.000 | 73 | 0.999 | 113            | 0.997        | 153        | 0.001        | 33        | 0.999        | 73        | 0.000        |
| 34          | 1.000 | 74 | 1.000 | 114            | 0.996        | 154        | 0.001        | 34        | 0.975        | 74        | 0.000        |
| 35          | 1.000 | 75 | 0.999 | 115            | 0.988        | 155        | 0.001        | 35        | 0.998        | 75        | -0.002       |
| 36          | 1.000 | 76 | 0.999 | 116            | 0.997        | 156        | 0.001        | 36        | 0.994        | 76        | 0.000        |
| 37          | 1.000 | 77 | 1.000 | 117            | 0.999        | 157        | 0.000        | <b>37</b> | <b>0.895</b> | 77        | 0.000        |
| 38          | 1.000 | 78 | 0.999 | 118            | 0.998        | 158        | 0.001        | <b>38</b> | <b>0.930</b> | 78        | 0.000        |
| 39          | 1.000 | 79 | 1.000 | <b>119</b>     | <b>0.988</b> | 159        | 0.001        | 39        | 0.994        | 79        | -0.002       |
| 40          | 1.000 | 80 | 1.000 | 120            | 0.992        | 160        | 0.000        | <b>40</b> | <b>0.019</b> | 80        | 0.000        |

**Table S2.** Gross populations in FO of Au<sub>13</sub>-G1 (N5) for the spin-down electrons.  
 HOMO is 124 for Au<sub>13</sub> and is 39 for guanine.

|    |       |    |       |            |              |            |              |           |              |           |              |
|----|-------|----|-------|------------|--------------|------------|--------------|-----------|--------------|-----------|--------------|
| 1  | 1.000 | 41 | 1.000 | 81         | 0.999        | 121        | 0.999        | 1         | 1.000        | <b>41</b> | <b>0.012</b> |
| 2  | 1.000 | 42 | 1.000 | 82         | 0.999        | <b>122</b> | <b>0.976</b> | 2         | 1.000        | 42        | 0.002        |
| 3  | 1.000 | 43 | 1.000 | 83         | 1.000        | 123        | 0.993        | 3         | 1.000        | <b>43</b> | <b>0.011</b> |
| 4  | 1.000 | 44 | 1.000 | 84         | 0.998        | <b>124</b> | <b>0.131</b> | 4         | 1.000        | 44        | 0.001        |
| 5  | 1.000 | 45 | 1.000 | 85         | 0.998        | <b>125</b> | <b>0.040</b> | 5         | 1.000        | 45        | 0.001        |
| 6  | 1.000 | 46 | 1.000 | 86         | 0.999        | <b>126</b> | <b>0.044</b> | 6         | 1.000        | 46        | 0.001        |
| 7  | 1.000 | 47 | 1.000 | 87         | 0.999        | <b>127</b> | <b>0.036</b> | 7         | 1.000        | 47        | 0.003        |
| 8  | 1.000 | 48 | 1.000 | 88         | 1.000        | 128        | 0.004        | 8         | 1.000        | 48        | 0.003        |
| 9  | 1.000 | 49 | 1.000 | 89         | 0.999        | 129        | 0.009        | 9         | 1.000        | 49        | 0.001        |
| 10 | 1.000 | 50 | 1.000 | 90         | 1.000        | 130        | 0.037        | 10        | 1.000        | 50        | 0.001        |
| 11 | 1.000 | 51 | 1.000 | 91         | 0.998        | 131        | 0.006        | 11        | 1.000        | 51        | 0.000        |
| 12 | 1.000 | 52 | 1.000 | 92         | 0.997        | 132        | 0.002        | 12        | 1.001        | 52        | 0.002        |
| 13 | 1.000 | 53 | 0.999 | 93         | 0.997        | 133        | 0.015        | 13        | 0.997        | 53        | 0.003        |
| 14 | 1.000 | 54 | 1.003 | 94         | 0.992        | 134        | 0.009        | 14        | 0.997        | 54        | 0.001        |
| 15 | 1.000 | 55 | 1.000 | 95         | 0.999        | 135        | 0.003        | 15        | 0.999        | 55        | 0.000        |
| 16 | 1.000 | 56 | 1.001 | 96         | 0.999        | 136        | 0.007        | 16        | 0.998        | 56        | 0.001        |
| 17 | 0.999 | 57 | 1.000 | 97         | 0.999        | 137        | 0.004        | 17        | 0.994        | 57        | 0.000        |
| 18 | 1.000 | 58 | 1.001 | 98         | 0.999        | 138        | 0.003        | 18        | 0.997        | 58        | 0.000        |
| 19 | 1.000 | 59 | 1.001 | 99         | 0.998        | 139        | 0.002        | 19        | 0.998        | 59        | 0.000        |
| 20 | 1.000 | 60 | 1.004 | 100        | 0.992        | 140        | 0.009        | 20        | 0.998        | 60        | 0.001        |
| 21 | 1.000 | 61 | 1.003 | 101        | 0.999        | 141        | 0.001        | 21        | 0.995        | 61        | 0.001        |
| 22 | 1.000 | 62 | 1.000 | 102        | 0.995        | 142        | 0.008        | 22        | 0.998        | 62        | 0.000        |
| 23 | 1.000 | 63 | 1.000 | 103        | 0.997        | 143        | 0.001        | 23        | 0.999        | 63        | 0.000        |
| 24 | 1.000 | 64 | 1.000 | 104        | 0.998        | 144        | 0.001        | 24        | 0.998        | 64        | 0.002        |
| 25 | 1.000 | 65 | 1.000 | 105        | 0.997        | 145        | 0.001        | 25        | 0.999        | 65        | 0.001        |
| 26 | 1.000 | 66 | 1.000 | 106        | 0.999        | 146        | 0.000        | 26        | 0.998        | 66        | 0.001        |
| 27 | 1.000 | 67 | 1.000 | 107        | 0.998        | 147        | 0.001        | 27        | 1.000        | 67        | 0.001        |
| 28 | 1.000 | 68 | 1.000 | 108        | 0.995        | 148        | 0.000        | 28        | 0.999        | 68        | 0.000        |
| 29 | 1.000 | 69 | 1.000 | 109        | 0.994        | 149        | 0.001        | 29        | 1.000        | 69        | -0.002       |
| 30 | 1.000 | 70 | 1.000 | 110        | 0.998        | 150        | 0.001        | 30        | 0.999        | 70        | 0.000        |
| 31 | 1.000 | 71 | 0.998 | 111        | 0.997        | 151        | 0.002        | 31        | 0.966        | 71        | -0.001       |
| 32 | 1.000 | 72 | 1.000 | 112        | 0.998        | 152        | 0.001        | 32        | 0.999        | 72        | -0.001       |
| 33 | 1.000 | 73 | 0.999 | 113        | 0.997        | 153        | 0.001        | 33        | 0.999        | 73        | 0.000        |
| 34 | 1.000 | 74 | 1.000 | 114        | 0.996        | 154        | 0.001        | 34        | 0.973        | 74        | 0.000        |
| 35 | 1.000 | 75 | 1.000 | 115        | 0.997        | 155        | 0.001        | 35        | 0.997        | 75        | -0.002       |
| 36 | 1.000 | 76 | 0.999 | 116        | 0.990        | 156        | 0.001        | 36        | 0.994        | 76        | 0.000        |
| 37 | 1.000 | 77 | 1.000 | 117        | 0.998        | 157        | 0.000        | <b>37</b> | <b>0.890</b> | 77        | 0.000        |
| 38 | 1.000 | 78 | 0.999 | 118        | 0.996        | 158        | 0.001        | <b>38</b> | <b>0.924</b> | 78        | 0.001        |
| 39 | 1.000 | 79 | 1.000 | 119        | 0.995        | 159        | 0.001        | 39        | 0.992        | 79        | -0.002       |
| 40 | 1.000 | 80 | 1.000 | <b>120</b> | <b>0.979</b> | 160        | 0.000        | <b>40</b> | <b>0.014</b> | 80        | 0.000        |

**Table S3.** Spin-up FOs for Au<sub>13</sub>

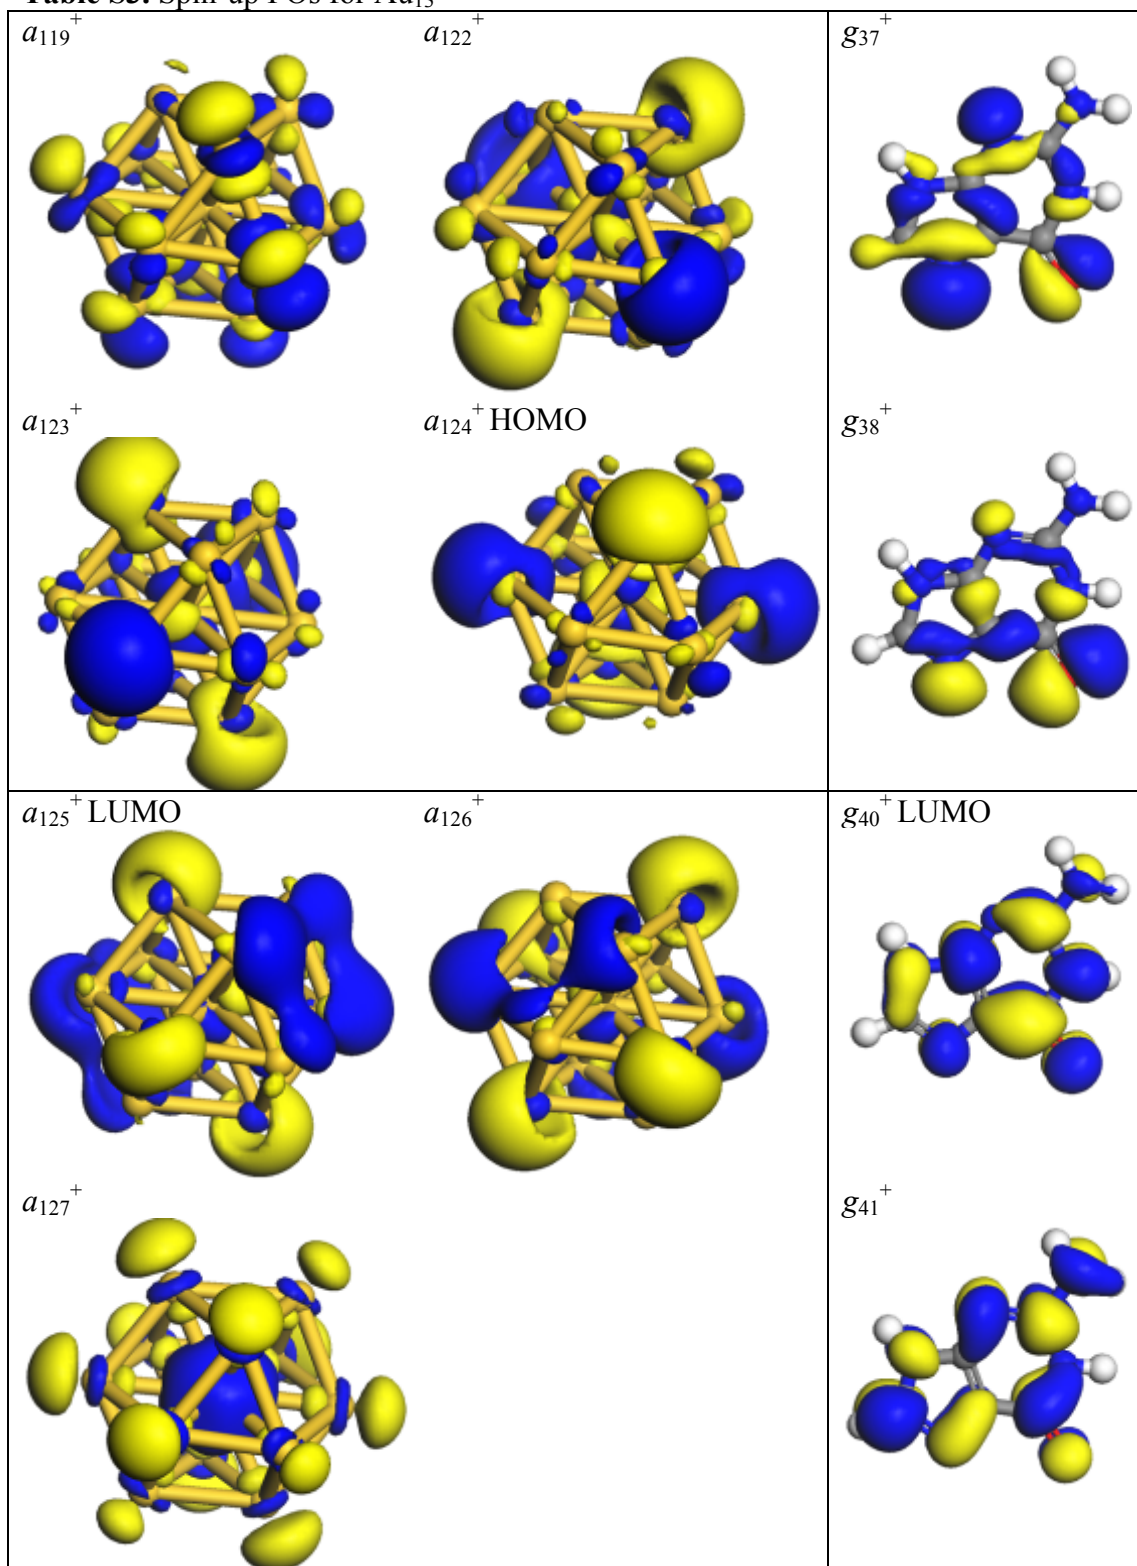

**Table S4.** Spin-down FOs for Au<sub>13</sub>

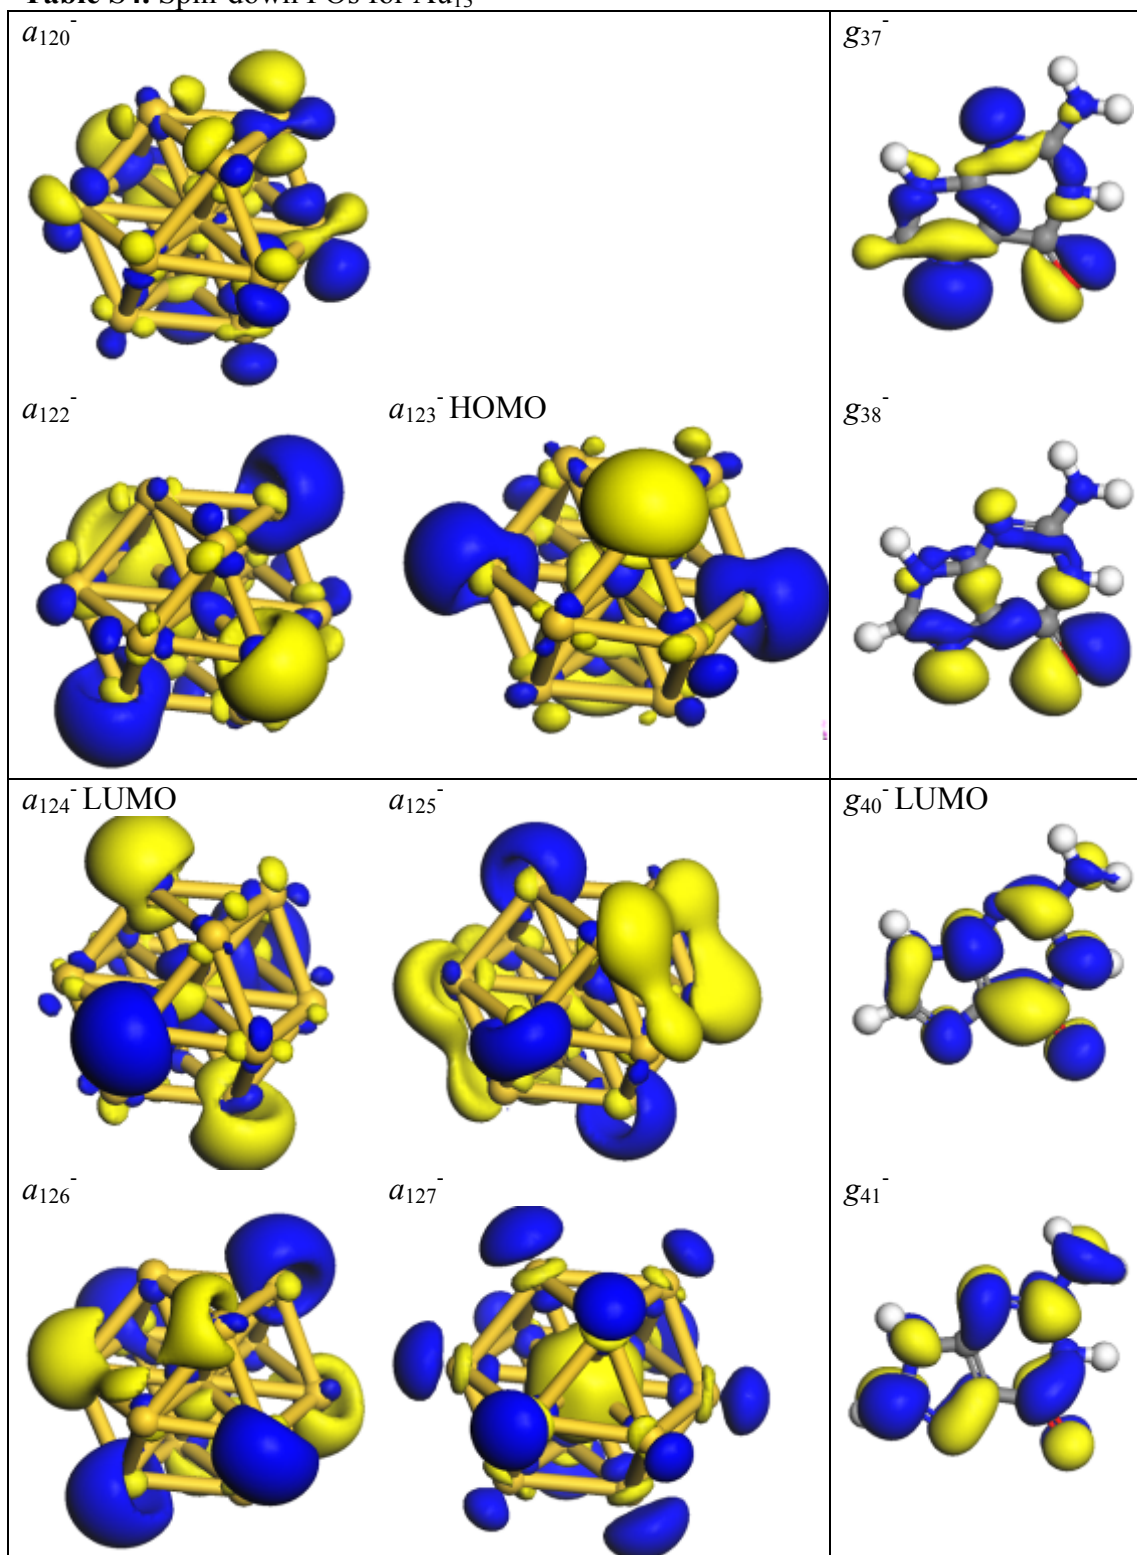



**Table S5.** Shape and coefficients of key MO in the Au<sub>13</sub>-G1 Complex (bold numbers indicate occupied FOs)

|                                                                                                                                                                                                                                                                          |                                                                                                                                                                                                                                                                    |
|--------------------------------------------------------------------------------------------------------------------------------------------------------------------------------------------------------------------------------------------------------------------------|--------------------------------------------------------------------------------------------------------------------------------------------------------------------------------------------------------------------------------------------------------------------|
| $\psi_{159}^+$ : -0.20117 Ha<br>$0.66 a_{119} - 0.49 a_{120} - 0.22 a_{123}$<br>$- 0.079 a_{125} - 0.062 a_{126} - 0.075 a_{127}$<br>$- 0.21 g_{38} - 0.02 g_{40} + 0.023 g_{41}$ 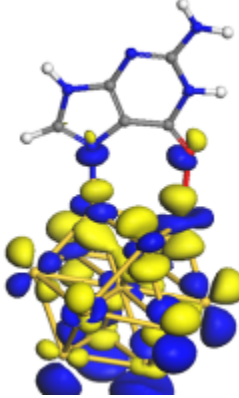      | $\psi_{159}^-$ : -0.20029 Ha<br>$-0.78 a_{120} + 0.25 a_{119} + 0.21 a_{124}$<br>$-0.075 a_{125} - 0.06 a_{126} - 0.08 a_{127}$<br>$+ 0.21 g_{38} + 0.02 g_{40} - 0.023 g_{41}$  |
| $\psi_{162}^+$ : -0.16224 Ha<br>$+0.73 a_{122} - 0.17 a_{123} + 0.62 a_{124}$<br>$- 0.13 a_{126} - 0.095 g_{37} - 0.071 g_{38}$<br>$- 0.031 g_{40} + 0.049 g_{41}$                    | $\psi_{162}^-$ : -0.16118 Ha<br>$-0.75 a_{122} + 0.62 a_{123} - 0.06 a_{124}$<br>$+ 0.13 a_{126} - 0.091 g_{37} - 0.077 g_{38}$<br>$- 0.035 g_{40} + 0.053 g_{41}$             |
| $\psi_{163}^+$ (HOMO): -0.15274 Ha<br>$-0.83 a_{123} - 0.16 a_{124} + 0.46 a_{125}$<br>$+ 0.13 a_{126} + 0.12 a_{127} - 0.089 g_{37}$<br>$+ 0.11 g_{38} + 0.07 g_{40} + 0.07 g_{41}$  | $\psi_{161}^-$ (LUMO): -0.14682 Ha<br>                                                                                                                                         |

#### 4. Au<sub>13</sub>-G2 (N(2)-Au; H...Au)

**Table S6.** Gross population changes of spin-up FOs.

|    |       |    |       |     |       |            |              |           |              |           |              |
|----|-------|----|-------|-----|-------|------------|--------------|-----------|--------------|-----------|--------------|
| 1  | 1.000 | 41 | 1.000 | 81  | 1.000 | 121        | 0.999        | 1         | 1.000        | 41        | 0.005        |
| 2  | 1.000 | 42 | 1.000 | 82  | 0.999 | <b>122</b> | <b>0.980</b> | 2         | 1.000        | <b>42</b> | <b>0.013</b> |
| 3  | 1.000 | 43 | 1.000 | 83  | 0.999 | <b>123</b> | <b>0.970</b> | 3         | 1.000        | 43        | 0.008        |
| 4  | 1.000 | 44 | 1.000 | 84  | 0.998 | <b>124</b> | <b>0.800</b> | 4         | 1.000        | <b>44</b> | <b>0.046</b> |
| 5  | 1.000 | 45 | 1.000 | 85  | 0.999 | <b>125</b> | <b>0.322</b> | 5         | 1.000        | <b>45</b> | <b>0.032</b> |
| 6  | 1.000 | 46 | 1.000 | 86  | 1.000 | 126        | 0.010        | 6         | 1.000        | 46        | 0.003        |
| 7  | 1.000 | 47 | 1.000 | 87  | 0.999 | <b>127</b> | <b>0.055</b> | 7         | 1.000        | 47        | 0.002        |
| 8  | 1.000 | 48 | 1.000 | 88  | 0.999 | 128        | 0.001        | 8         | 1.000        | 48        | 0.003        |
| 9  | 1.000 | 49 | 1.000 | 89  | 0.999 | 129        | 0.037        | 9         | 1.000        | 49        | 0.000        |
| 10 | 1.000 | 50 | 1.000 | 90  | 0.999 | 130        | 0.007        | 10        | 1.000        | 50        | -0.001       |
| 11 | 1.000 | 51 | 1.000 | 91  | 1.000 | 131        | 0.004        | 11        | 1.000        | 51        | 0.001        |
| 12 | 1.000 | 52 | 1.000 | 92  | 0.998 | 132        | 0.002        | 12        | 1.000        | 52        | 0.001        |
| 13 | 1.000 | 53 | 0.997 | 93  | 0.999 | 133        | 0.028        | 13        | 0.998        | 53        | 0.003        |
| 14 | 1.000 | 54 | 1.004 | 94  | 0.989 | 134        | 0.002        | 14        | 0.997        | 54        | 0.003        |
| 15 | 1.000 | 55 | 1.001 | 95  | 1.000 | 135        | 0.001        | 15        | 0.998        | 55        | 0.001        |
| 16 | 1.000 | 56 | 1.000 | 96  | 1.000 | 136        | 0.007        | 16        | 0.992        | 56        | -0.001       |
| 17 | 0.999 | 57 | 1.000 | 97  | 1.000 | 137        | 0.004        | 17        | 0.997        | 57        | -0.001       |
| 18 | 1.000 | 58 | 1.000 | 98  | 1.000 | 138        | 0.001        | 18        | 0.998        | 58        | 0.000        |
| 19 | 1.000 | 59 | 1.000 | 99  | 0.998 | 139        | 0.004        | 19        | 0.997        | 59        | 0.000        |
| 20 | 1.000 | 60 | 1.011 | 100 | 0.997 | 140        | 0.001        | 20        | 0.996        | 60        | 0.000        |
| 21 | 1.000 | 61 | 1.000 | 101 | 1.000 | 141        | 0.001        | 21        | 0.992        | 61        | 0.000        |
| 22 | 1.000 | 62 | 1.000 | 102 | 0.996 | 142        | 0.009        | 22        | 0.995        | 62        | 0.000        |
| 23 | 1.000 | 63 | 1.000 | 103 | 0.999 | 143        | 0.001        | 23        | 0.997        | 63        | -0.001       |
| 24 | 1.000 | 64 | 1.000 | 104 | 0.995 | 144        | 0.000        | 24        | 0.999        | 64        | -0.002       |
| 25 | 1.000 | 65 | 0.999 | 105 | 0.997 | 145        | 0.002        | 25        | 0.995        | 65        | 0.000        |
| 26 | 1.000 | 66 | 0.999 | 106 | 1.000 | 146        | 0.000        | 26        | 0.994        | 66        | -0.001       |
| 27 | 1.000 | 67 | 1.000 | 107 | 0.999 | 147        | 0.001        | 27        | 1.001        | 67        | -0.001       |
| 28 | 1.000 | 68 | 1.000 | 108 | 0.999 | 148        | 0.000        | 28        | 0.999        | 68        | 0.000        |
| 29 | 1.000 | 69 | 1.000 | 109 | 1.000 | 149        | 0.001        | 29        | 1.000        | 69        | 0.000        |
| 30 | 1.000 | 70 | 1.000 | 110 | 0.998 | 150        | 0.000        | 30        | 1.000        | 70        | -0.001       |
| 31 | 1.000 | 71 | 0.998 | 111 | 0.998 | 151        | 0.001        | 31        | 0.999        | 71        | 0.000        |
| 32 | 1.000 | 72 | 0.999 | 112 | 0.998 | 152        | 0.002        | 32        | 0.999        | 72        | 0.000        |
| 33 | 1.000 | 73 | 0.999 | 113 | 0.999 | 153        | 0.001        | 33        | 0.998        | 73        | 0.000        |
| 34 | 1.000 | 74 | 1.000 | 114 | 0.995 | 154        | 0.000        | <b>34</b> | <b>0.869</b> | 74        | 0.000        |
| 35 | 1.000 | 75 | 1.000 | 115 | 0.979 | 155        | 0.002        | 35        | 0.999        | 75        | 0.000        |
| 36 | 1.000 | 76 | 0.995 | 116 | 0.999 | 156        | 0.000        | 36        | 0.999        | 76        | -0.001       |
| 37 | 1.000 | 77 | 1.000 | 117 | 0.995 | 157        | 0.000        | <b>37</b> | <b>0.951</b> | 77        | -0.001       |
| 38 | 1.000 | 78 | 1.000 | 118 | 0.998 | 158        | 0.001        | <b>38</b> | <b>0.975</b> | 78        | -0.002       |
| 39 | 1.000 | 79 | 1.000 | 119 | 0.984 | 159        | 0.000        | 39        | 0.992        | 79        | 0.000        |
| 40 | 1.000 | 80 | 0.999 | 120 | 0.997 | 160        | 0.000        | 40        | 0.003        | 80        | 0.000        |

**Table S7.** Gross population changes of spin-down FOs.

|    |       |    |       |     |       |            |              |           |              |           |              |
|----|-------|----|-------|-----|-------|------------|--------------|-----------|--------------|-----------|--------------|
| 1  | 1.000 | 41 | 1.000 | 81  | 1.000 | 121        | 0.999        | 1         | 1.000        | 41        | 0.005        |
| 2  | 1.000 | 42 | 1.000 | 82  | 0.999 | <b>122</b> | <b>0.976</b> | 2         | 1.000        | <b>42</b> | <b>0.013</b> |
| 3  | 1.000 | 43 | 1.000 | 83  | 0.999 | <b>123</b> | <b>0.975</b> | 3         | 1.000        | 43        | 0.008        |
| 4  | 1.000 | 44 | 1.000 | 84  | 0.998 | <b>124</b> | <b>0.137</b> | 4         | 1.000        | <b>44</b> | <b>0.045</b> |
| 5  | 1.000 | 45 | 1.000 | 85  | 0.999 | <b>125</b> | <b>0.038</b> | 5         | 1.000        | <b>45</b> | <b>0.030</b> |
| 6  | 1.000 | 46 | 1.000 | 86  | 1.000 | 126        | 0.010        | 6         | 1.000        | 46        | 0.003        |
| 7  | 1.000 | 47 | 1.000 | 87  | 0.999 | 127        | 0.044        | 7         | 1.000        | 47        | 0.001        |
| 8  | 1.000 | 48 | 1.000 | 88  | 0.999 | 128        | 0.001        | 8         | 1.000        | 48        | 0.003        |
| 9  | 1.000 | 49 | 1.000 | 89  | 0.999 | 129        | 0.015        | 9         | 1.000        | 49        | 0.000        |
| 10 | 1.000 | 50 | 1.000 | 90  | 0.999 | 130        | 0.013        | 10        | 1.000        | 50        | -0.001       |
| 11 | 1.000 | 51 | 1.000 | 91  | 1.000 | 131        | 0.004        | 11        | 1.000        | 51        | 0.001        |
| 12 | 1.000 | 52 | 1.000 | 92  | 0.998 | 132        | 0.002        | 12        | 1.000        | 52        | 0.001        |
| 13 | 1.000 | 53 | 0.997 | 93  | 0.999 | 133        | 0.025        | 13        | 0.998        | 53        | 0.003        |
| 14 | 1.000 | 54 | 1.003 | 94  | 0.987 | 134        | 0.002        | 14        | 0.997        | 54        | 0.003        |
| 15 | 1.000 | 55 | 1.001 | 95  | 1.000 | 135        | 0.001        | 15        | 0.998        | 55        | 0.001        |
| 16 | 1.000 | 56 | 1.000 | 96  | 1.000 | 136        | 0.006        | 16        | 0.992        | 56        | -0.001       |
| 17 | 0.999 | 57 | 1.000 | 97  | 1.000 | 137        | 0.004        | 17        | 0.997        | 57        | -0.001       |
| 18 | 1.000 | 58 | 1.000 | 98  | 0.999 | 138        | 0.001        | 18        | 0.998        | 58        | 0.000        |
| 19 | 1.000 | 59 | 1.000 | 99  | 0.998 | 139        | 0.005        | 19        | 0.997        | 59        | 0.000        |
| 20 | 1.000 | 60 | 1.011 | 100 | 0.997 | 140        | 0.001        | 20        | 0.996        | 60        | 0.000        |
| 21 | 1.000 | 61 | 1.000 | 101 | 1.000 | 141        | 0.001        | 21        | 0.992        | 61        | 0.000        |
| 22 | 1.000 | 62 | 0.999 | 102 | 0.995 | 142        | 0.007        | 22        | 0.995        | 62        | 0.000        |
| 23 | 1.000 | 63 | 1.000 | 103 | 0.999 | 143        | 0.001        | 23        | 0.997        | 63        | -0.001       |
| 24 | 1.000 | 64 | 1.000 | 104 | 0.994 | 144        | 0.001        | 24        | 0.999        | 64        | -0.002       |
| 25 | 1.000 | 65 | 0.999 | 105 | 0.997 | 145        | 0.002        | 25        | 0.995        | 65        | 0.000        |
| 26 | 1.000 | 66 | 0.999 | 106 | 1.000 | 146        | 0.000        | 26        | 0.994        | 66        | -0.001       |
| 27 | 1.000 | 67 | 1.000 | 107 | 0.999 | 147        | 0.001        | 27        | 1.001        | 67        | -0.001       |
| 28 | 1.000 | 68 | 1.000 | 108 | 0.999 | 148        | 0.000        | 28        | 0.999        | 68        | 0.000        |
| 29 | 1.000 | 69 | 1.000 | 109 | 1.000 | 149        | 0.001        | 29        | 1.000        | 69        | 0.000        |
| 30 | 1.000 | 70 | 1.000 | 110 | 0.998 | 150        | 0.000        | 30        | 1.000        | 70        | -0.001       |
| 31 | 1.000 | 71 | 0.998 | 111 | 0.998 | 151        | 0.001        | 31        | 0.999        | 71        | 0.000        |
| 32 | 1.000 | 72 | 0.999 | 112 | 0.999 | 152        | 0.002        | 32        | 0.999        | 72        | 0.000        |
| 33 | 1.000 | 73 | 0.999 | 113 | 0.997 | 153        | 0.001        | 33        | 0.998        | 73        | 0.000        |
| 34 | 1.000 | 74 | 1.000 | 114 | 0.995 | 154        | 0.000        | <b>34</b> | <b>0.861</b> | 74        | 0.000        |
| 35 | 1.000 | 75 | 1.000 | 115 | 0.998 | 155        | 0.001        | 35        | 0.999        | 75        | 0.000        |
| 36 | 1.000 | 76 | 0.995 | 116 | 0.995 | 156        | 0.000        | 36        | 0.999        | 76        | -0.001       |
| 37 | 1.000 | 77 | 1.000 | 117 | 0.980 | 157        | 0.000        | <b>37</b> | <b>0.947</b> | 77        | -0.001       |
| 38 | 1.000 | 78 | 1.000 | 118 | 0.997 | 158        | 0.001        | <b>38</b> | <b>0.972</b> | 78        | -0.001       |
| 39 | 1.000 | 79 | 1.000 | 119 | 0.984 | 159        | 0.000        | 39        | 0.993        | 79        | 0.000        |
| 40 | 1.000 | 80 | 0.999 | 120 | 0.997 | 160        | 0.000        | 40        | 0.002        | 80        | 0.000        |

**Table S8.** Spin-up FOs (spin-down FOs are similar; the only difference is that  $a_{124}^-$  is the LUMO there).

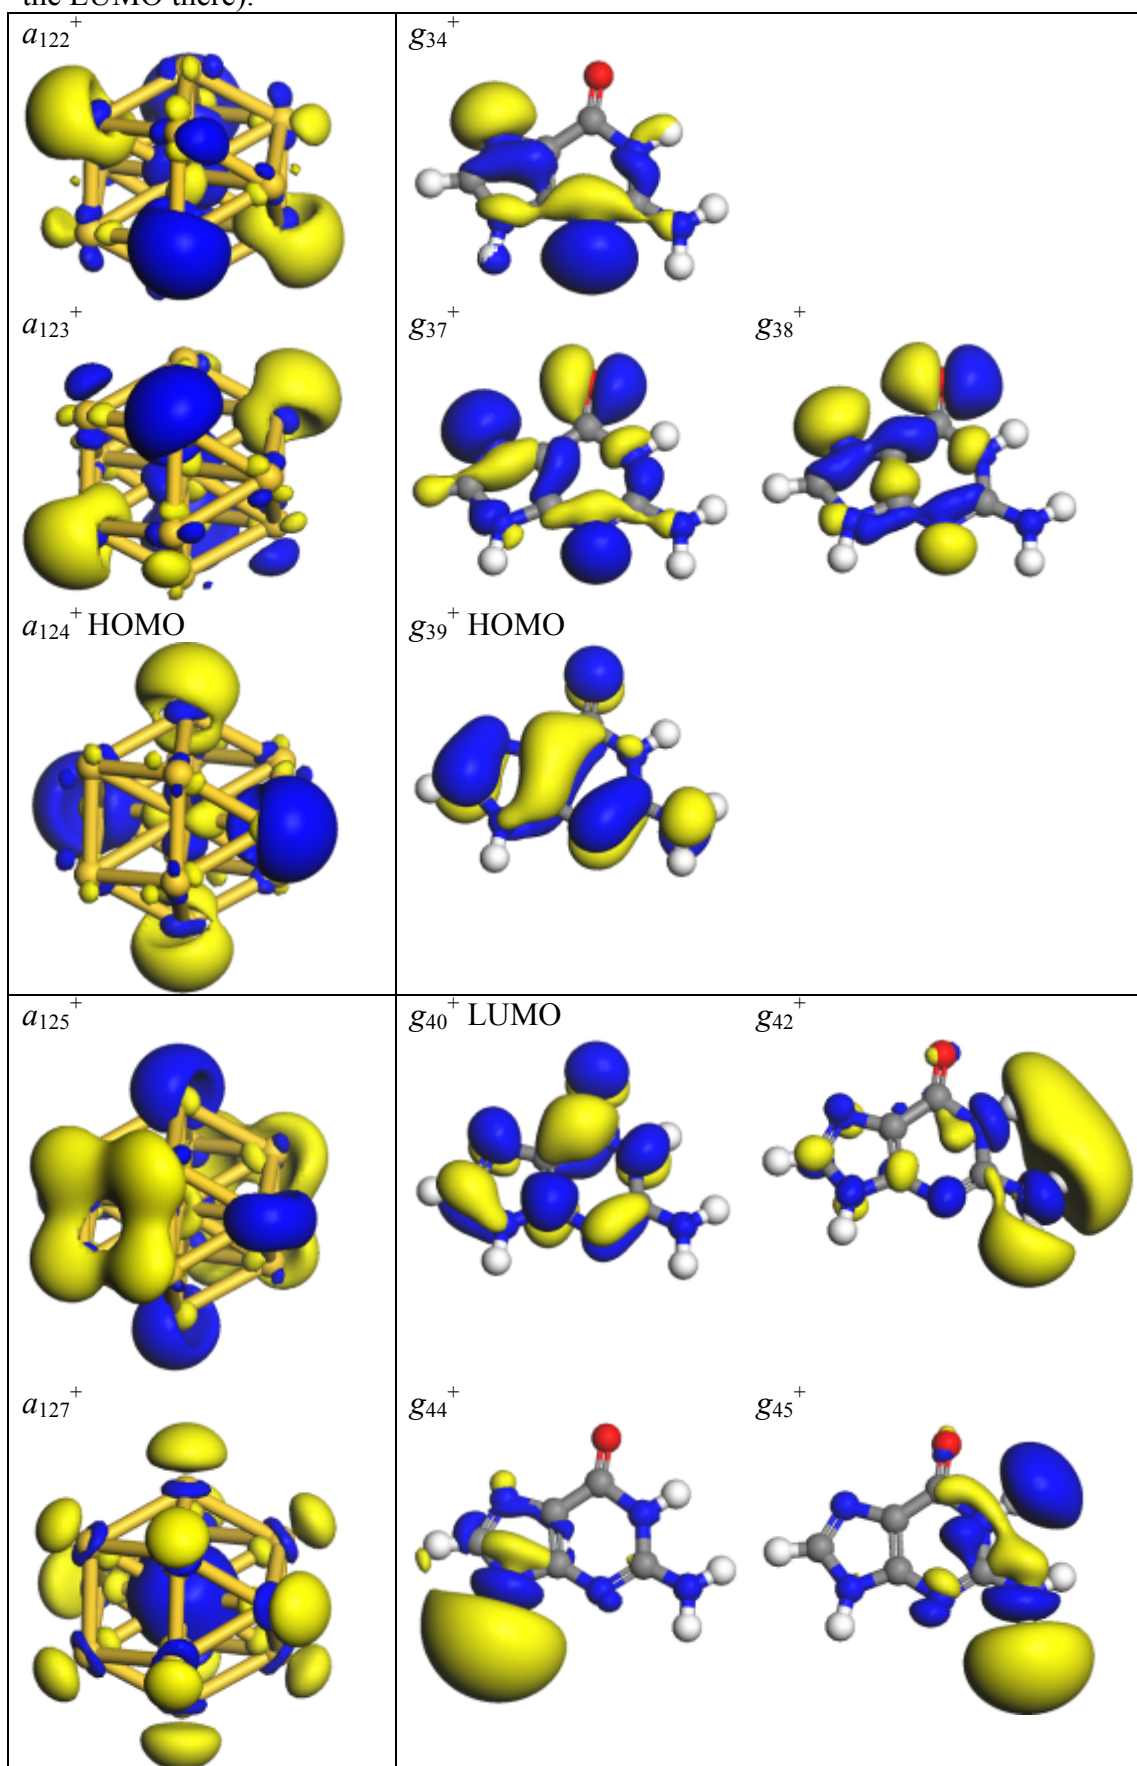

**Table S9.** MO of Au<sub>13</sub>-G2 Complex

|                                                                                                                                                                                                                                                                                                                                                         |                                                                                                                                                                                                                                                                                                                 |
|---------------------------------------------------------------------------------------------------------------------------------------------------------------------------------------------------------------------------------------------------------------------------------------------------------------------------------------------------------|-----------------------------------------------------------------------------------------------------------------------------------------------------------------------------------------------------------------------------------------------------------------------------------------------------------------|
| <p><math>\psi_{161}^+</math>: -0.20522 Ha<br/> <b>-0.59</b> <math>a_{122}</math> <b>+0.76</b> <math>a_{123}</math><br/>                 +0.044 <math>g_{42}</math> -0.078 <math>g_{44}</math> +0.048 <math>g_{45}</math></p> 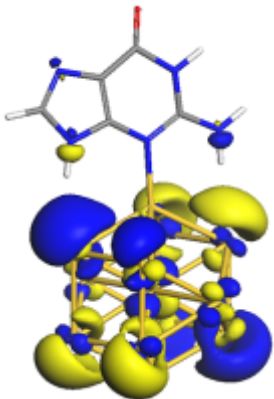                                          | <p><math>\psi_{161}^-</math>: -0.20420 Ha<br/> <b>+0.68</b> <math>a_{122}</math> <b>-0.69</b> <math>a_{123}</math><br/>                 -0.044 <math>g_{42}</math> +0.078 <math>g_{44}</math> -0.048 <math>g_{45}</math></p>  |
| <p><math>\psi_{162}^+</math>: -0.20162 Ha<br/> <b>-0.78</b> <math>a_{122}</math> <b>-0.61</b> <math>a_{123}</math><br/>                 -0.015 <math>g_{44}</math> -0.017 <math>g_{45}</math></p>                                                                     | <p><math>\psi_{162}^-</math>: -0.20055 Ha<br/> <b>+0.71</b> <math>a_{122}</math> <b>+0.70</b> <math>a_{123}</math><br/>                 +0.016 <math>g_{44}</math> +0.017 <math>g_{45}</math></p>                            |
| <p><math>\psi_{163}^+</math> (HOMO): -0.18670 Ha<br/>                 0.83 <math>a_{124}</math> +0.52 <math>a_{125}</math> -0.11 <math>a_{127}</math><br/> <b>+0.12</b> <math>g_{34}</math> <b>+0.081</b> <math>g_{37}</math> <b>-0.061</b> <math>g_{38}</math></p>  | <p><math>\psi_{163}^-</math> (LUMO): -0.18049 Ha</p>                                                                                                                                                                        |

## 5. XYZ coordinates of optimized geometries

=====Au13-G1 29 atoms=====

|    | x         | y         | z         |
|----|-----------|-----------|-----------|
| Au | 0.000000  | 0.000000  | 0.000000  |
| Au | 2.816750  | -0.064064 | -0.556080 |
| Au | 0.740504  | -0.354383 | -2.523204 |
| Au | 3.442945  | -0.490983 | -3.144352 |
| Au | 2.209357  | 1.941327  | -2.373402 |
| Au | -2.004901 | -0.242897 | -1.926548 |
| Au | -0.728089 | -2.652187 | -2.737096 |
| Au | 1.293648  | -2.439207 | -0.779629 |
| Au | -1.219371 | -0.629523 | -4.543557 |
| Au | 0.289067  | 1.682068  | -4.414792 |
| Au | -0.524427 | 2.085102  | -1.790241 |
| Au | 1.504473  | -0.719696 | -5.126196 |
| Au | 1.970518  | -2.819826 | -3.448752 |
| N  | 0.000000  | 0.000000  | 2.090529  |
| O  | 3.160881  | 0.000000  | 1.737880  |
| N  | -0.778248 | -0.481342 | 4.092344  |
| C  | -1.085880 | -0.103666 | 2.822086  |
| H  | -2.097853 | 0.063868  | 2.458667  |
| C  | 1.057751  | -0.300998 | 2.910070  |
| C  | 2.463990  | -0.304639 | 2.705757  |
| N  | 3.128595  | -0.723742 | 3.873360  |
| H  | 4.148007  | -0.714605 | 3.767572  |
| C  | 2.552996  | -1.042394 | 5.067372  |
| N  | 3.366698  | -1.390481 | 6.083146  |
| H  | 4.325573  | -1.685186 | 5.920176  |
| H  | 2.904340  | -1.716140 | 6.930363  |
| N  | 1.257200  | -0.990538 | 5.262206  |
| C  | 0.575128  | -0.617086 | 4.177714  |
| H  | -1.432525 | -0.641656 | 4.858657  |

=====Au13-G2 29 atoms=====

|    | x         | y         | z         |
|----|-----------|-----------|-----------|
| Au | 0.000000  | 0.000000  | 0.000000  |
| Au | 2.570681  | 0.035270  | -1.169323 |
| Au | 0.134830  | -0.143763 | -2.627005 |
| Au | -0.636141 | -2.522232 | -3.938744 |
| Au | 1.708632  | -2.347707 | -2.376218 |
| Au | -0.837359 | -2.403472 | -1.213025 |
| Au | 0.950339  | 2.262907  | -1.405223 |
| Au | -1.429196 | 2.056096  | -2.892468 |
| Au | -2.429556 | -0.148167 | -1.422393 |
| Au | 1.095891  | 2.037494  | -4.127642 |
| Au | 2.683383  | -0.224391 | -3.928926 |
| Au | 0.291327  | -0.316904 | -5.330995 |
| Au | -2.241763 | -0.269010 | -4.194727 |
| N  | 0.000000  | 0.000000  | 2.078679  |
| H  | 2.630334  | 0.000000  | 1.252593  |
| N  | 2.411013  | -0.058692 | 2.271497  |
| C  | 3.263027  | -0.133498 | 3.346703  |
| H  | 4.345036  | -0.152942 | 3.218869  |
| N  | 2.628429  | -0.173314 | 4.486115  |
| C  | 1.305933  | -0.121347 | 4.157199  |
| C  | 0.138803  | -0.133711 | 4.978596  |
| O  | 0.001325  | -0.181395 | 6.182197  |
| N  | -1.036925 | -0.071347 | 4.155754  |
| H  | -1.895322 | -0.049411 | 4.713565  |
| C  | -1.110878 | -0.013674 | 2.806796  |
| N  | -2.304564 | 0.049381  | 2.205153  |
| H  | -3.158699 | -0.145857 | 2.720969  |
| H  | -2.320606 | -0.037533 | 1.169789  |
| C  | 1.159698  | -0.049932 | 2.779468  |

=====Au55-G1 71 atoms=====

|    | x        | y        | z        |
|----|----------|----------|----------|
| Au | -1.33948 | 0.10129  | 1.6634   |
| Au | -1.72893 | 2.05951  | 3.660949 |
| Au | 0.598228 | 0.458045 | 3.675795 |

|    |          |          |          |
|----|----------|----------|----------|
| Au | 0.235196 | 2.419324 | 1.684966 |
| Au | -4.93811 | -2.59558 | -0.3531  |
| Au | -2.57856 | -4.23842 | -0.3166  |
| Au | -2.91155 | -2.23536 | -2.36978 |
| Au | -0.6337  | -3.80023 | -2.20358 |
| Au | -0.96207 | -1.86219 | -0.32542 |
| Au | 1.357515 | -3.53727 | -0.30936 |
| Au | 0.971177 | -1.54342 | -2.34198 |
| Au | 2.985271 | -1.13938 | -0.26164 |
| Au | -5.14745 | -0.60178 | -2.26147 |
| Au | -5.67255 | 1.340565 | -0.36007 |
| Au | -3.28378 | -0.25825 | -0.32914 |
| Au | -3.64876 | 1.718157 | -2.36613 |
| Au | -1.32811 | 0.112345 | -2.44239 |
| Au | -1.7028  | 2.069048 | -0.31197 |
| Au | 0.650392 | 0.465828 | -0.33659 |
| Au | 0.245399 | 2.4432   | -2.33396 |
| Au | 2.505278 | 0.81498  | -2.21301 |
| Au | 2.243551 | 2.803618 | -0.28574 |
| Au | -4.04115 | 3.72691  | -0.32716 |
| Au | -2.0561  | 3.969563 | -2.21828 |
| Au | -0.11994 | 4.457224 | -0.31033 |
| Au | -4.49477 | -4.43974 | 1.651352 |
| Au | -4.97843 | -2.59343 | 3.637056 |
| Au | -2.60807 | -4.23024 | 3.655932 |
| Au | -2.94456 | -2.21854 | 1.658745 |
| Au | -0.60756 | -3.97274 | 1.683554 |
| Au | -1.00764 | -1.86352 | 3.657232 |
| Au | 1.321179 | -3.51727 | 3.685602 |
| Au | 0.965587 | -1.50992 | 1.684957 |
| Au | 3.186457 | -3.06484 | 1.705279 |
| Au | 2.966367 | -1.13785 | 3.683535 |
| Au | -5.40791 | -0.64834 | 1.633255 |
| Au | -5.70468 | 1.33099  | 3.634846 |
| Au | -3.32717 | -0.26172 | 3.645804 |
| Au | -3.67221 | 1.704667 | 1.658497 |
| Au | 2.697709 | 0.848199 | 1.69614  |
| Au | 2.24803  | 2.794488 | 3.683936 |
| Au | -5.91122 | 3.235358 | 1.648074 |
| Au | -4.06461 | 3.706728 | 3.652942 |
| Au | -2.10262 | 4.174424 | 1.678898 |
| Au | -0.13502 | 4.42807  | 3.683494 |
| Au | 1.764584 | 4.650002 | 1.697399 |
| Au | -2.9922  | -2.22588 | 5.688306 |
| Au | -0.68653 | -3.74594 | 5.578879 |
| Au | 0.942614 | -1.51092 | 5.719391 |
| Au | -5.22651 | -0.61113 | 5.541205 |
| Au | -3.70787 | 1.696356 | 5.684909 |
| Au | -1.37968 | 0.099329 | 5.790522 |
| Au | 0.218227 | 2.424905 | 5.70835  |
| Au | 2.453104 | 0.800547 | 5.597389 |
| Au | -2.0879  | 3.936965 | 5.573811 |
| N  | 5.413739 | 1.237179 | -5.33406 |
| C  | 4.782119 | 1.589126 | -4.18065 |
| H  | 5.024137 | 2.476899 | -3.59929 |
| N  | 3.851845 | 0.718162 | -3.8729  |
| C  | 3.86875  | -0.23722 | -4.85342 |
| C  | 3.085715 | -1.40557 | -5.05942 |
| O  | 2.162329 | -1.90038 | -4.41865 |
| N  | 3.492971 | -2.06108 | -6.2383  |
| H  | 2.927123 | -2.89122 | -6.44139 |
| C  | 4.484794 | -1.6663  | -7.08883 |
| N  | 4.708275 | -2.41431 | -8.18434 |
| H  | 4.322009 | -3.34722 | -8.29463 |
| H  | 5.506093 | -2.1376  | -8.7716  |
| N  | 5.199606 | -0.58441 | -6.88933 |
| C  | 4.852704 | 0.079139 | -5.78533 |
| H  | 6.16251  | 1.738446 | -5.79122 |

=====Au55-G2 71 atoms=====

|    | x        | y        | z        |
|----|----------|----------|----------|
| Au | 0.095787 | 0.044853 | -0.08032 |
| Au | -0.29295 | 2.00835  | 1.891746 |
| Au | 2.050051 | 0.422002 | 1.935129 |
| Au | 1.726597 | 2.376914 | -0.04013 |
| Au | -3.55819 | -2.64121 | -2.10604 |
| Au | -1.17274 | -4.27629 | -2.05176 |
| Au | -1.46846 | -2.27362 | -4.06909 |
| Au | 0.87135  | -3.80016 | -3.89663 |
| Au | 0.487817 | -1.92442 | -2.06087 |
| Au | 2.878527 | -3.50935 | -1.96861 |
| Au | 2.517079 | -1.5444  | -4.02601 |
| Au | 4.537586 | -1.15959 | -1.98085 |
| Au | -3.71805 | -0.66013 | -4.00866 |
| Au | -4.25446 | 1.283339 | -2.11946 |
| Au | -1.86702 | -0.31011 | -2.06543 |
| Au | -2.17681 | 1.632574 | -4.11304 |
| Au | 0.161194 | 0.028342 | -4.13317 |
| Au | -0.22074 | 1.992931 | -2.05518 |
| Au | 2.126871 | 0.412469 | -1.99778 |
| Au | 1.785143 | 2.346512 | -4.04501 |
| Au | 4.037159 | 0.758707 | -3.88723 |
| Au | 3.793225 | 2.751323 | -1.98767 |
| Au | -2.57803 | 3.641171 | -2.09607 |
| Au | -0.53828 | 3.870325 | -3.96112 |
| Au | 1.389233 | 4.362641 | -2.03708 |
| Au | -3.10539 | -4.4822  | -0.10684 |
| Au | -3.61323 | -2.62344 | 1.861484 |
| Au | -1.20972 | -4.25417 | 1.886937 |
| Au | -1.54801 | -2.25344 | -0.09651 |
| Au | 0.830397 | -3.96381 | -0.0603  |
| Au | 0.420762 | -1.89453 | 1.90166  |
| Au | 2.78298  | -3.5283  | 1.951242 |
| Au | 2.446936 | -1.52307 | -0.02751 |
| Au | 4.706515 | -3.0433  | 0.027494 |
| Au | 4.45735  | -1.14804 | 1.997303 |
| Au | -4.01213 | -0.68247 | -0.12957 |
| Au | -4.30692 | 1.285498 | 1.850359 |
| Au | -1.92137 | -0.30169 | 1.87359  |
| Au | -2.24601 | 1.647063 | -0.10822 |
| Au | 4.204622 | 0.817673 | 0.002919 |
| Au | 3.73013  | 2.757777 | 1.976712 |
| Au | -4.47756 | 3.185029 | -0.13906 |
| Au | -2.64471 | 3.647503 | 1.866541 |
| Au | -0.64261 | 4.073285 | -0.0844  |
| Au | 1.32362  | 4.389674 | 1.933288 |
| Au | 3.262801 | 4.604466 | -0.01686 |
| Au | -1.58557 | -2.25606 | 3.909791 |
| Au | 0.732565 | -3.77286 | 3.805455 |
| Au | 2.372133 | -1.53592 | 3.973147 |
| Au | -3.82839 | -0.64089 | 3.768094 |
| Au | -2.29955 | 1.652703 | 3.907411 |
| Au | 0.03566  | 0.059853 | 3.997688 |
| Au | 1.656146 | 2.386881 | 3.957133 |
| Au | 3.894478 | 0.773115 | 3.881877 |
| Au | -0.65975 | 3.885788 | 3.790576 |
| N  | -0.41378 | -6.86003 | -4.26918 |
| C  | -0.7673  | -8.17383 | -4.46534 |
| H  | -1.67463 | -8.59338 | -4.03144 |
| N  | 0.09302  | -8.8167  | -5.20554 |
| C  | 1.053764 | -7.89826 | -5.51197 |
| C  | 2.257324 | -8.02504 | -6.26912 |
| O  | 2.739003 | -8.96645 | -6.86253 |
| N  | 2.956668 | -6.77147 | -6.28308 |
| H  | 3.814188 | -6.81462 | -6.8412  |
| C  | 2.593775 | -5.60798 | -5.69514 |
| N  | 3.374878 | -4.52735 | -5.83168 |
| H  | 4.333159 | -4.61663 | -6.15942 |
| H  | 3.127422 | -3.69342 | -5.26859 |
| N  | 1.462447 | -5.52589 | -5.0082  |

|   |          |          |          |
|---|----------|----------|----------|
| C | 0.746837 | -6.67326 | -4.93755 |
| H | -0.86857 | -6.14003 | -3.6755  |

=====Au147-G1 163 atoms=====

|    | x        | y        | z        |
|----|----------|----------|----------|
| Au | 0.187854 | -0.86118 | 0.829162 |
| Au | 0.12682  | 1.287665 | 2.648831 |
| Au | 2.159542 | -0.65975 | 2.839003 |
| Au | 2.146861 | 1.166686 | 0.686723 |
| Au | 4.337778 | -0.77794 | 0.884961 |
| Au | 4.146347 | 1.350421 | 2.683426 |
| Au | 6.405791 | -0.5763  | 2.877849 |
| Au | 6.400205 | 1.228204 | 0.742974 |
| Au | 0.121746 | 3.267471 | 0.484233 |
| Au | 0.054328 | 5.512345 | 2.283114 |
| Au | 2.070358 | 3.335525 | 2.492567 |
| Au | 2.063265 | 5.385896 | 0.334264 |
| Au | 0.137209 | -0.51758 | 4.960452 |
| Au | 0.064914 | 1.629525 | 6.877323 |
| Au | 2.078697 | -0.30798 | 7.06923  |
| Au | 2.077174 | 1.477828 | 4.688123 |
| Au | 0.073187 | 3.406098 | 4.438676 |
| Au | -0.00107 | 5.45622  | 6.175382 |
| Au | 2.047331 | 3.599657 | 6.503744 |
| Au | 2.039082 | 5.492146 | 4.273924 |
| Au | 4.092389 | -0.45498 | 4.821402 |
| Au | 4.012479 | 1.715943 | 6.692799 |
| Au | 5.953531 | -0.26505 | 6.743365 |
| Au | 6.102352 | 1.585253 | 4.664898 |
| Au | 4.078548 | 3.153919 | 0.551916 |
| Au | 4.022626 | 5.347193 | 2.399854 |
| Au | 6.104304 | 3.338203 | 2.572102 |
| Au | 5.959421 | 5.082239 | 0.391914 |
| Au | 4.216523 | 3.695632 | 4.669622 |
| Au | -5.55558 | -6.80802 | 1.252309 |
| Au | -5.70319 | -5.06916 | -0.92357 |
| Au | -5.71202 | -3.2995  | -3.00131 |
| Au | -5.76955 | -4.7309  | 3.090325 |
| Au | -6.00558 | -2.95525 | 0.920076 |
| Au | -5.82196 | -2.65693 | 4.848997 |
| Au | -5.57968 | -1.44424 | -5.07367 |
| Au | -6.01048 | -1.142   | -1.22718 |
| Au | -5.78788 | 0.69936  | -3.34117 |
| Au | -6.06794 | -0.81676 | 2.718776 |
| Au | -6.0726  | 0.988995 | 0.586551 |
| Au | -5.73224 | -0.94229 | 6.59249  |
| Au | -5.89451 | 1.356219 | 4.514375 |
| Au | -5.84161 | 2.793512 | -1.582   |
| Au | -5.9022  | 3.109303 | 2.423712 |
| Au | -5.77213 | 4.859286 | 0.254996 |
| Au | -3.63239 | -7.07202 | -0.74558 |
| Au | -1.64173 | -7.21136 | -2.6092  |
| Au | -3.67165 | -6.74276 | 3.283135 |
| Au | -1.67511 | -7.11258 | 1.323244 |
| Au | -1.76666 | -6.54706 | 5.231352 |
| Au | -3.6248  | -3.43719 | -5.03217 |
| Au | -1.65854 | -5.31871 | -4.84482 |
| Au | -3.81873 | -5.41785 | -3.01316 |
| Au | -3.75538 | -3.07086 | -1.02687 |
| Au | -1.686   | -5.06205 | -0.82825 |
| Au | -1.69126 | -3.19823 | -3.02894 |
| Au | -3.69401 | -4.87461 | 1.105669 |
| Au | -3.80535 | -2.74409 | 2.941766 |
| Au | -1.75581 | -4.73291 | 3.101028 |
| Au | -1.7622  | -2.88461 | 0.974048 |
| Au | -3.94335 | -4.72668 | 5.258683 |
| Au | -3.79651 | -2.4446  | 6.922744 |
| Au | -1.83419 | -4.32225 | 7.107085 |
| Au | -1.80445 | -2.55643 | 4.961917 |
| Au | -3.69645 | 0.573798 | -5.36427 |

|    |          |          |          |                              |          |          |          |
|----|----------|----------|----------|------------------------------|----------|----------|----------|
| Au | -1.69708 | -1.41515 | -5.41511 | Au                           | 4.081449 | -2.29579 | 7.025274 |
| Au | -3.70593 | -1.26546 | -3.15543 | Au                           | 6.169628 | -2.42505 | 5.001254 |
| Au | -3.81375 | 0.893548 | -1.35804 | Au                           | 4.187192 | 0.72368  | -5.26766 |
| Au | -1.77331 | -1.05973 | -1.18056 | Au                           | 6.132665 | -1.22792 | -4.94179 |
| Au | -1.77597 | 0.735523 | -3.36692 | Au                           | 4.209959 | -1.10706 | -3.05616 |
| Au | -3.95392 | -0.94274 | 0.775423 | Au                           | 4.193917 | 1.050005 | -1.26397 |
| Au | -3.88212 | 1.200606 | 2.59052  | Au                           | 6.462453 | -0.90695 | -1.06452 |
| Au | -1.83078 | -0.72964 | 2.791452 | Au                           | 6.216687 | 0.937917 | -3.19819 |
| Au | -1.83472 | 1.083744 | 0.641273 | Au                           | 4.329841 | 3.014577 | -3.59317 |
| Au | -3.80979 | -0.61324 | 4.721364 | Au                           | 4.054754 | 5.030011 | -1.62242 |
| Au | -3.8885  | 1.583575 | 6.575759 | Au                           | 6.156955 | 3.014785 | -1.43033 |
| Au | -1.87374 | -0.38258 | 7.017991 | N                            | 0.220618 | 7.371151 | -8.65902 |
| Au | -1.88151 | 1.409965 | 4.638939 | C                            | 0.696093 | 6.751712 | -7.5461  |
| Au | -1.79743 | 2.530525 | -5.52648 | H                            | 1.599954 | 7.046276 | -7.01671 |
| Au | -3.97281 | 2.858053 | -3.7028  | N                            | -0.10813 | 5.781579 | -7.1738  |
| Au | -3.80754 | 4.882196 | -1.70905 | C                            | -1.12143 | 5.738814 | -8.08813 |
| Au | -1.8176  | 2.938171 | -1.51089 | C                            | -2.31232 | 4.965627 | -8.11731 |
| Au | -1.8314  | 4.77549  | -3.57118 | O                            | -2.67527 | 4.019513 | -7.42756 |
| Au | -3.82202 | 3.000335 | 0.447752 | N                            | -3.16079 | 5.433288 | -9.1437  |
| Au | -3.88472 | 5.203445 | 2.286783 | H                            | -4.03037 | 4.896215 | -9.22058 |
| Au | -1.88636 | 3.261754 | 2.446838 | C                            | -2.90437 | 6.467132 | -10.0007 |
| Au | -1.8871  | 5.311072 | 0.287721 | N                            | -3.84383 | 6.788353 | -10.9043 |
| Au | -4.09232 | 3.537015 | 4.565174 | H                            | -4.7566  | 6.346648 | -10.9429 |
| Au | -1.96386 | 3.510994 | 6.464687 | H                            | -3.62162 | 7.540431 | -11.554  |
| Au | -1.97723 | 5.410144 | 4.224516 | N                            | -1.79041 | 7.162287 | -9.96519 |
| Au | 0.379495 | -7.1706  | -4.51502 | C                            | -0.95515 | 6.769772 | -9.00423 |
| Au | 0.330436 | -7.24103 | -0.621   | H                            | 0.620462 | 8.189107 | -9.12014 |
| Au | 2.363875 | -7.13118 | -2.56964 |                              |          |          |          |
| Au | 0.28135  | -6.91067 | 3.325119 |                              |          |          |          |
| Au | 2.278652 | -7.03855 | 1.382136 |                              |          |          |          |
| Au | 0.216566 | -6.20129 | 7.135961 | =====Au147-G2 163 atoms===== |          |          |          |
| Au | 2.25684  | -6.47346 | 5.277478 | x                            | y        | z        |          |
| Au | 0.318569 | -3.34935 | -5.22589 | Au                           | 0.101522 | 0.03444  | 0.014227 |
| Au | 2.348134 | -5.23677 | -4.80907 | Au                           | 0.140273 | 2.024529 | 2.029296 |
| Au | 0.312579 | -5.13379 | -2.78535 | Au                           | 2.018181 | -0.10568 | 2.089628 |
| Au | 0.260872 | -3.01139 | -0.99152 | Au                           | 2.208083 | 1.905999 | 0.098778 |
| Au | 2.279313 | -4.98887 | -0.79078 | Au                           | 4.185552 | -0.22983 | 0.164089 |
| Au | 2.273292 | -3.13201 | -2.98332 | Au                           | 4.161667 | 1.752394 | 2.155347 |
| Au | 0.259933 | -4.9943  | 1.168874 | Au                           | 6.183726 | -0.38279 | 2.223849 |
| Au | 0.199548 | -2.68662 | 2.979632 | Au                           | 6.392501 | 1.609451 | 0.260034 |
| Au | 2.228718 | -4.66279 | 3.159205 | Au                           | 0.341859 | 4.13228  | 0.030968 |
| Au | 2.218429 | -2.80749 | 1.022481 | Au                           | 0.405396 | 6.204538 | 2.011678 |
| Au | 0.206808 | -4.48563 | 5.106013 | Au                           | 2.254642 | 3.914241 | 2.089629 |
| Au | 0.13411  | -2.31389 | 7.20633  | Au                           | 2.448045 | 6.078662 | 0.109162 |
| Au | 2.182533 | -4.25052 | 7.159829 | Au                           | -0.05457 | 0.007432 | 4.122295 |
| Au | 2.145196 | -2.47987 | 5.013444 | Au                           | -0.00213 | 1.984287 | 6.207338 |
| Au | 0.251789 | 0.601292 | -5.5635  | Au                           | 1.837252 | -0.12332 | 6.275149 |
| Au | 2.263965 | -1.33979 | -5.36808 | Au                           | 2.051824 | 1.877456 | 4.118635 |
| Au | 0.249758 | -1.2033  | -3.30911 | Au                           | 0.19763  | 3.988829 | 4.005307 |
| Au | 0.190498 | 0.963979 | -1.31635 | Au                           | 0.252992 | 5.899286 | 5.908137 |
| Au | 2.212788 | -0.98845 | -1.12796 | Au                           | 2.11976  | 3.840274 | 6.11447  |
| Au | 2.217216 | 0.819748 | -3.32122 | Au                           | 2.329504 | 5.896963 | 4.062272 |
| Au | 0.204683 | 4.599788 | -5.43253 | Au                           | 3.900913 | -0.24502 | 4.130861 |
| Au | 2.220521 | 2.60609  | -5.45144 | Au                           | 3.94378  | 1.763309 | 6.175654 |
| Au | 0.19841  | 2.739844 | -3.49062 | Au                           | 5.723989 | -0.38268 | 6.111155 |
| Au | 0.114504 | 5.177242 | -1.64392 | Au                           | 6.048704 | 1.631049 | 4.214553 |
| Au | 2.121598 | 2.998042 | -1.4711  | Au                           | 4.309686 | 3.75565  | 0.18367  |
| Au | 2.132647 | 4.834056 | -3.54119 | Au                           | 4.343112 | 5.774721 | 2.192211 |
| Au | 4.274996 | -6.92955 | -0.62915 | Au                           | 6.25934  | 3.591878 | 2.270806 |
| Au | 4.212566 | -6.59264 | 3.397638 | Au                           | 6.329997 | 5.533171 | 0.264713 |
| Au | 6.156727 | -6.58356 | 1.399413 | Au                           | 4.288348 | 3.856368 | 4.286984 |
| Au | 4.277332 | -3.30302 | -4.92565 | Au                           | -6.1575  | -5.43478 | -0.24663 |
| Au | 4.476531 | -5.26466 | -2.91129 | Au                           | -6.0625  | -3.50323 | -2.26169 |
| Au | 4.274928 | -2.92378 | -0.93086 | Au                           | -5.85122 | -1.56045 | -4.2078  |
| Au | 6.294004 | -4.83786 | -0.77016 | Au                           | -6.22903 | -3.5209  | 1.769307 |
| Au | 6.292646 | -3.07784 | -2.85454 | Au                           | -6.20094 | -1.53071 | -0.24186 |
| Au | 4.228541 | -4.72101 | 1.21579  | Au                           | -6.16997 | -1.59777 | 3.742388 |
| Au | 4.215216 | -2.58735 | 3.027271 | Au                           | -5.52796 | 0.423809 | -6.12117 |
| Au | 6.232797 | -4.51262 | 3.251557 | Au                           | -5.99907 | 0.441601 | -2.21556 |
| Au | 6.469032 | -2.71339 | 1.073055 | Au                           | -5.62481 | 2.431457 | -4.18363 |
| Au | 4.355432 | -4.57209 | 5.368668 | Au                           | -6.14768 | 0.428023 | 1.763896 |
|    |          |          |          | Au                           | -5.958   | 2.400316 | -0.2114  |



|    |          |          |          |    |          |          |          |
|----|----------|----------|----------|----|----------|----------|----------|
| Au | -5.98294 | 0.371768 | 5.689093 | Au | 0.456248 | 2.060294 | -6.16078 |
| Au | -5.90725 | 2.403218 | 3.77736  | Au | 2.301167 | -0.04624 | -6.0889  |
| Au | -5.60399 | 4.362783 | -2.20747 | Au | 0.251696 | 0.060756 | -4.09529 |
| Au | -5.73276 | 4.345809 | 1.835151 | Au | 0.291395 | 2.064715 | -1.99335 |
| Au | -5.44429 | 6.243933 | -0.16586 | Au | 2.167164 | -0.0745  | -1.92186 |
| Au | -4.16519 | -5.69275 | -2.18103 | Au | 2.366819 | 1.927071 | -3.9129  |
| Au | -2.13438 | -5.82087 | -4.05066 | Au | 0.622616 | 6.043083 | -5.84242 |
| Au | -4.32303 | -5.71338 | 1.833788 | Au | 2.548799 | 3.930455 | -5.90581 |
| Au | -2.28835 | -6.01021 | -0.10109 | Au | 0.504341 | 4.074521 | -3.97765 |
| Au | -2.45008 | -5.84416 | 3.856723 | Au | 0.529898 | 6.218758 | -1.93296 |
| Au | -3.72335 | -1.69562 | -6.17101 | Au | 2.396825 | 3.940872 | -1.87712 |
| Au | -1.90181 | -3.77363 | -6.09799 | Au | 2.594332 | 5.928781 | -3.85842 |
| Au | -4.0773  | -3.77414 | -4.27413 | Au | 3.744884 | -6.22105 | -1.88278 |
| Au | -3.95526 | -1.67541 | -2.14884 | Au | 3.581195 | -6.24455 | 2.126184 |
| Au | -2.06542 | -3.84758 | -2.07012 | Au | 5.589769 | -6.22673 | 0.206604 |
| Au | -1.84649 | -1.81274 | -4.11055 | Au | 4.145117 | -2.19408 | -5.84348 |
| Au | -4.12221 | -3.66655 | -0.16602 | Au | 4.08093  | -4.31827 | -3.95531 |
| Au | -4.11731 | -1.69472 | 1.842591 | Au | 4.051728 | -2.21639 | -1.81717 |
| Au | -2.21761 | -3.86676 | 1.892915 | Au | 5.912854 | -4.30948 | -1.79046 |
| Au | -2.0282  | -1.8258  | -0.07585 | Au | 6.102537 | -2.34649 | -3.72587 |
| Au | -4.40066 | -3.80264 | 3.932212 | Au | 3.795696 | -4.2093  | 0.151667 |
| Au | -4.1968  | -1.74984 | 5.880205 | Au | 3.907624 | -2.22463 | 2.135481 |
| Au | -2.37808 | -3.82436 | 5.932249 | Au | 5.759358 | -4.3295  | 2.225231 |
| Au | -2.17954 | -1.84605 | 3.953087 | Au | 6.130122 | -2.34979 | 0.234088 |
| Au | -3.50511 | 2.311587 | -6.14898 | Au | 3.760679 | -4.3525  | 4.23191  |
| Au | -1.62032 | 0.191091 | -6.26678 | Au | 3.678487 | -2.26132 | 6.156793 |
| Au | -3.70705 | 0.309804 | -4.12489 | Au | 5.806598 | -2.39016 | 4.187132 |
| Au | -3.722   | 2.286301 | -2.12269 | Au | 4.374467 | 1.835686 | -5.82893 |
| Au | -1.81475 | 0.182384 | -2.07703 | Au | 6.170213 | -0.30475 | -5.63347 |
| Au | -1.612   | 2.175329 | -4.09045 | Au | 4.212849 | -0.2051  | -3.78733 |
| Au | -4.00231 | 0.298158 | -0.14722 | Au | 4.305125 | 1.787339 | -1.80568 |
| Au | -3.86693 | 2.266919 | 1.852516 | Au | 6.33475  | -0.36185 | -1.73093 |
| Au | -1.97188 | 0.149025 | 1.957396 | Au | 6.35278  | 1.673074 | -3.69785 |
| Au | -1.77669 | 2.1383   | -0.05028 | Au | 4.590199 | 3.8955   | -3.90958 |
| Au | -4.0226  | 0.279865 | 3.839053 | Au | 4.479806 | 5.795454 | -1.82194 |
| Au | -3.93396 | 2.253122 | 5.902017 | Au | 6.415826 | 3.617249 | -1.74265 |
| Au | -2.0968  | 0.12679  | 6.137615 | N  | -2.64905 | 6.985166 | -6.89054 |
| Au | -1.90836 | 2.127647 | 3.984272 | C  | -3.80377 | 7.339154 | -7.54149 |
| Au | -1.45455 | 4.124628 | -6.02995 | H  | -4.78378 | 7.081293 | -7.13858 |
| Au | -3.62908 | 4.427422 | -4.23682 | N  | -3.57159 | 7.988071 | -8.64807 |
| Au | -3.454   | 6.289772 | -2.08915 | C  | -2.21325 | 8.064586 | -8.73152 |
| Au | -1.55763 | 4.185514 | -2.02041 | C  | -1.39449 | 8.679096 | -9.72293 |
| Au | -1.44386 | 6.172497 | -3.92844 | O  | -1.6745  | 9.278387 | -10.7391 |
| Au | -3.62707 | 4.249887 | -0.12539 | N  | -0.01382 | 8.521356 | -9.37116 |
| Au | -3.56323 | 6.260279 | 1.903796 | H  | 0.609205 | 8.991972 | -10.0335 |
| Au | -1.71647 | 4.161396 | 1.945826 | C  | 0.499542 | 7.877386 | -8.30017 |
| Au | -1.50842 | 6.339027 | -0.02721 | N  | 1.831311 | 7.84069  | -8.13353 |
| Au | -3.8815  | 4.364342 | 3.991411 | H  | 2.459874 | 8.026468 | -8.91077 |
| Au | -1.87113 | 4.08781  | 5.972413 | H  | 2.162902 | 7.244558 | -7.36058 |
| Au | -1.67633 | 6.139185 | 3.916318 | N  | -0.28346 | 7.302544 | -7.3975  |
| Au | -0.03865 | -5.82628 | -5.90074 | C  | -1.61725 | 7.439931 | -7.64014 |
| Au | -0.23006 | -6.13752 | -1.99998 | H  | -2.56998 | 6.475863 | -5.98722 |
| Au | 1.871552 | -6.08659 | -3.89599 |    |          |          |          |
| Au | -0.3864  | -6.16014 | 1.944779 |    |          |          |          |
| Au | 1.669358 | -6.2823  | 0.048456 |    |          |          |          |
| Au | -0.4968  | -5.87794 | 5.843037 |    |          |          |          |
| Au | 1.560046 | -6.13121 | 3.996695 |    |          |          |          |
| Au | 0.223485 | -1.91346 | -6.1892  |    |          |          |          |
| Au | 2.080062 | -4.02531 | -5.94535 |    |          |          |          |
| Au | 0.001314 | -3.92719 | -3.97935 |    |          |          |          |
| Au | 0.042515 | -1.95031 | -2.00022 |    |          |          |          |
| Au | 1.898675 | -4.10884 | -1.91821 |    |          |          |          |
| Au | 2.102752 | -2.06277 | -3.95097 |    |          |          |          |
| Au | -0.16888 | -4.06785 | -0.01564 |    |          |          |          |
| Au | -0.1032  | -1.97291 | 1.992298 |    |          |          |          |
| Au | 1.725709 | -4.13617 | 2.054104 |    |          |          |          |
| Au | 1.95966  | -2.09723 | 0.070734 |    |          |          |          |
| Au | -0.33293 | -3.95771 | 3.951637 |    |          |          |          |
| Au | -0.25804 | -1.98066 | 6.194784 |    |          |          |          |
| Au | 1.618968 | -4.09376 | 6.069478 |    |          |          |          |
| Au | 1.799733 | -2.11438 | 4.096661 |    |          |          |          |
